# Supplementary material for: A lncRNA TCL6-miR-155 Interaction Regulates the Src-Akt-EMT Network to Mediate Kidney Cancer Progression and Metastasis
Source: Oxford University Press journal article supplement (doi:10.1158/0008-5472.can-20-0832), 2021-01-26
Supplement: 00085472can200832-sup-239216_3_supp_6833436_qmnkkk.docx [file 00085472can200832-sup-239216_3_supp_6833436_qmnkkk.docx]

**Supplementary Table 1**

**Primer Sequences**

| **Sequence** | **Primer name** |
| --- | --- |
| CATTGCAGATTCGAGTCACGTC | TCL6-Forward |
| CCTCCCCAGCTTCTGTTGTA | TCL6-Reverse |
| GAGCGGCTCCAGATTGTCAA | Src- Forward |
| CTGGGGATGTAGCCTGTCTGT | Src- Reverse |
| CCATCTGCTTAGTAGAGCTT | HPRT1-Forward |
| GGAATGCAGCAACTGACATT | HPRT1-Reverse |
| TCTTCACCACCATGGAGAAG | GAPDH-Forward |
| GCAGAGATGATGACCCTTTTG | GAPDH-Reverse |
| CCTCTGGAATTTAGCGCTCG | α-E-Catenin – Forward |
| TCTCAACTGCCAGAGTCCTG | α -E-Catenin – Reverse |
| ACAAGCATGTCTCTCTGCCAA | Fibronectin- Forward |
| GCAATGTGCAGCCCTCATTT | Fibronectin- Reverse |
| 5’-AAACTGCTCCCTGAACTGTTGGTATTAAT-3' | TCL6- wild type-Forward |
| 5’-CTAGATTAATACCAACAGTTCAGGGAGCAGTTT-3’ | TCL6- wild type-Reverse |
| 5’-AAACTGCTCAATGAATTGTTGGTCTGCCT-3’ | TCL6-mutant- Forward |
| 5’-CTAGAGGCAGACCAACAATTCATTGAGCAGTTT-3’ | TCL6-mutant- Reverse |
